# Supplementary material for: Synthesis and exploration of a 1 H -germol-1-ide/pyridine bidentate ligand
Source: Royal Society of Chemistry journal article supplement (doi:10.1039/d4dt03134b), 2024-12-12
Supplement: d4dt03134b1.pdf [file d4dt03134b1.pdf]

Supporting Information

for

## **Synthesis and exploration of a 1*H*-germol-1-ide/pyridine bidentate ligand**

Chenghuan Liu,<sup>a,\*</sup> Marc Schmidtman,<sup>a</sup> Thomas Müller<sup>a,\*</sup>

Institute of Chemistry, Carl von Ossietzky University Oldenburg, Carl von Ossietzky-  
Str. 9-11

D-26129 Oldenburg, Federal Republic of Germany, European Union

### **Table of Contents.**

|                           |      |
|---------------------------|------|
| Experimental Part         | S-2  |
| Details of X-ray Analysis | S-15 |
| Computational Details     | S-20 |
| References                | S-23 |

## Experimental Part

**General.** All manipulations of air- and moisture-sensitive compounds were carried out under an argon 5.0 or nitrogen 5.0 atmosphere using Schlenk techniques or a standard glove box (Braun Unilab). Glassware was dried in an oven at  $T = 120\text{ }^{\circ}\text{C}$  and evacuated prior to use. The solvents THF, diethylether and *n*-hexane were dried over sodium and distilled under a nitrogen atmosphere. Benzene- $d_6$  was stored over molecular sieves (4 Å) after drying over potassium. All used standard chemicals were obtained from commercial suppliers and used as delivered if not mentioned otherwise. Dichlorogermole<sup>[S1]</sup> and  $\text{PyN}(\text{SiMe}_3)\text{Li}$ <sup>[S2]</sup> were prepared according to modified literature procedures.

**NMR spectroscopy.** NMR spectra were recorded on Bruker Avance DRX 500 and Bruker Avance III 500 spectrometers.  $^1\text{H}$  NMR spectra were calibrated against the residual proton signal of the solvent as internal reference (Benzene- $d_6$ :  $\delta\ ^1\text{H}(\text{C}_6\text{D}_5\text{H}) = 7.15$ ; and  $^{13}\text{C}\{^1\text{H}\}$  NMR spectra by using the central line of the solvent signal (Benzene- $d_6$ :  $\delta\ ^{13}\text{C}(\text{C}_6\text{D}_6) = 128.06$ .  $^{29}\text{Si}\{^1\text{H}\}$  NMR spectra were calibrated against an external standard ( $\delta\ ^{29}\text{Si}(\text{Me}_2\text{SiHCl}) = 11.1$  versus tetramethylsilane (TMS).  $^{119}\text{Sn}\{^1\text{H}\}$  NMR were referenced to an external standard tetramethyltin(IV) ( $\delta\ ^{119}\text{Sn}(\text{Me}_4\text{Sn in C}_6\text{D}_6) = 0$ ). The  $^{29}\text{Si}\{^1\text{H}\}$  NMR inverse gated spectra were recorded with a relaxation delay  $D1 = 10\text{ s}$ .

**Mass spectrometry:** Mass spectra were recorded on a Waters Q-ToF Premier (ESI-MS) and Thermo Scientific DFS (CI-/EI-MS). The used method for each compound is given in the experimental part.

## Synthesis of 7:

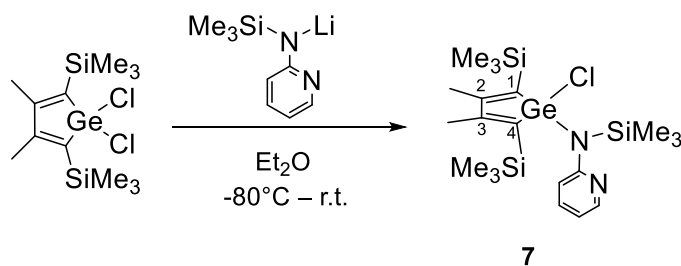

Scheme S1

**7.** A solution of Germole-Cl<sub>2</sub> (258 mg, 0.7 mmol, 1 eq.) in Et<sub>2</sub>O (6 mL) was slowly added to a solution of PyN(SiMe<sub>3</sub>)Li (137 mg, 0.7 mmol) in Et<sub>2</sub>O (10 mL) at -80 °C. The reaction mixture was allowed to warm to room temperature and reacted for overnight. The solvent was removed under vacuum. The residue was re-dissolved in n-hexane (15 mL) and the filtrate was removed solvent to get brown solid **7**. Yellow single crystals suitable for XRD investigations were obtained from the evaporation of n-hexane solvent of compound **7**. Yield: 250mg (0.50 mmol, 71%).

NMR spectra for **7** recorded in C<sub>6</sub>D<sub>6</sub> at 305 K.

<sup>1</sup>H NMR (499.9 MHz, 305.0 K, C<sub>6</sub>D<sub>6</sub>): δ = 0.24 (s, 18 H, C-Si(CH<sub>3</sub>)<sub>3</sub>), 0.56 (s, 9 H, N-Si(CH<sub>3</sub>)<sub>3</sub>), 1.96 (s, 6H, CH<sub>3</sub>), 6.21 (m, 1H, Py), 6.57 (d, 1H, Py), 6.94 (m, 1H, Py), 7.49 (m, 1H, Py).

<sup>13</sup>C{<sup>1</sup>H} NMR (125.8 MHz, 305.0 K, C<sub>6</sub>D<sub>6</sub>): δ = 0.70 (C-SiMe<sub>3</sub>), 3.41 (N-SiMe<sub>3</sub>), 19.83 (CH<sub>3</sub>), 112.65, 114.74, 137.80 (Py), 139.38(C<sup>1/4</sup>), 145.61 (Py), 154.71 (C<sup>2/3</sup>), 161.96 (Py).

<sup>29</sup>Si{<sup>1</sup>H} NMR (99.4 MHz, 305.0 K, C<sub>6</sub>D<sub>6</sub>): δ = -8.54 (C-SiMe<sub>3</sub>), 7.15 (N-SiMe<sub>3</sub>).

EA: C/H/N [%] calculated for C<sub>20</sub>H<sub>37</sub>ClGeN<sub>2</sub>Si<sub>3</sub>: 48.25/7.49/5.63;

found:48.34/7.63/5.46.

HR-MS (ESI): m/z calculated for C<sub>20</sub>H<sub>37</sub>ClGeN<sub>2</sub>Si<sub>3</sub> +H: 499.1238; found: 499.1233.

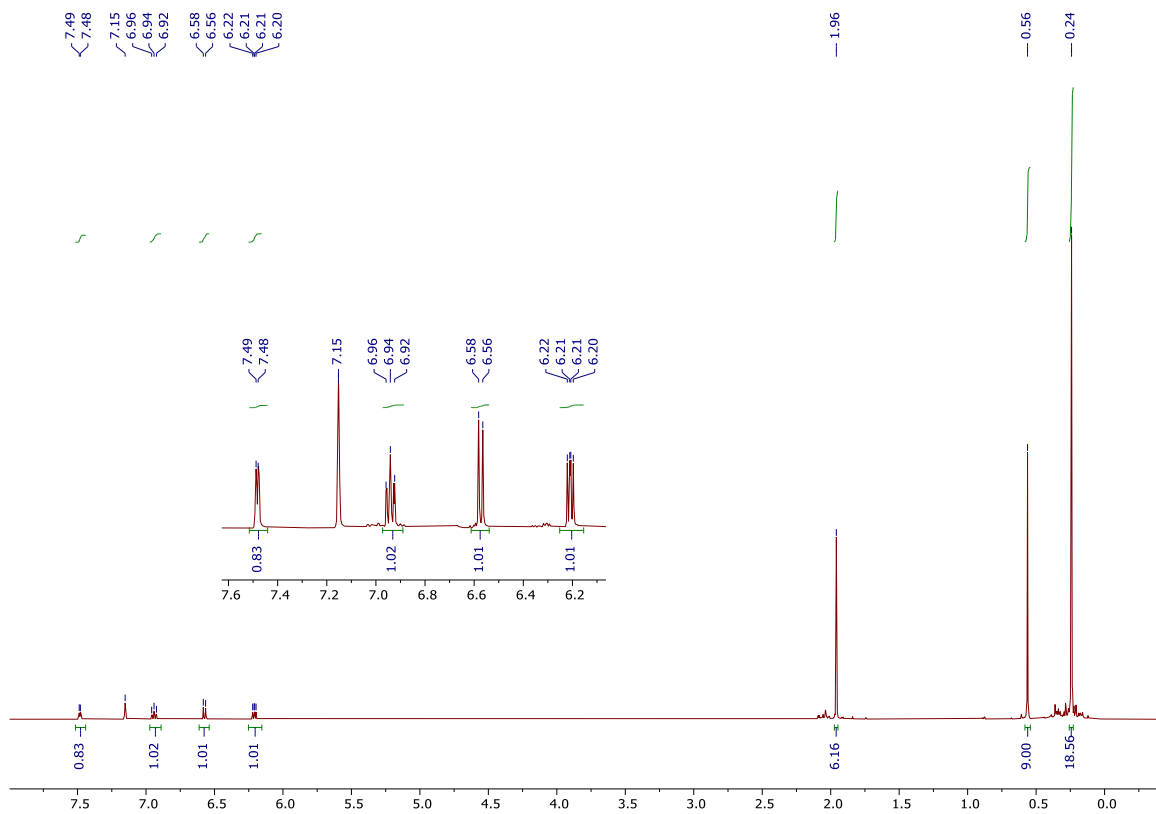

Figure S1a.  $^1\text{H}$  NMR (499.9 MHz, 305.0 K,  $\text{C}_6\text{D}_6$ ) spectrum of **7**.

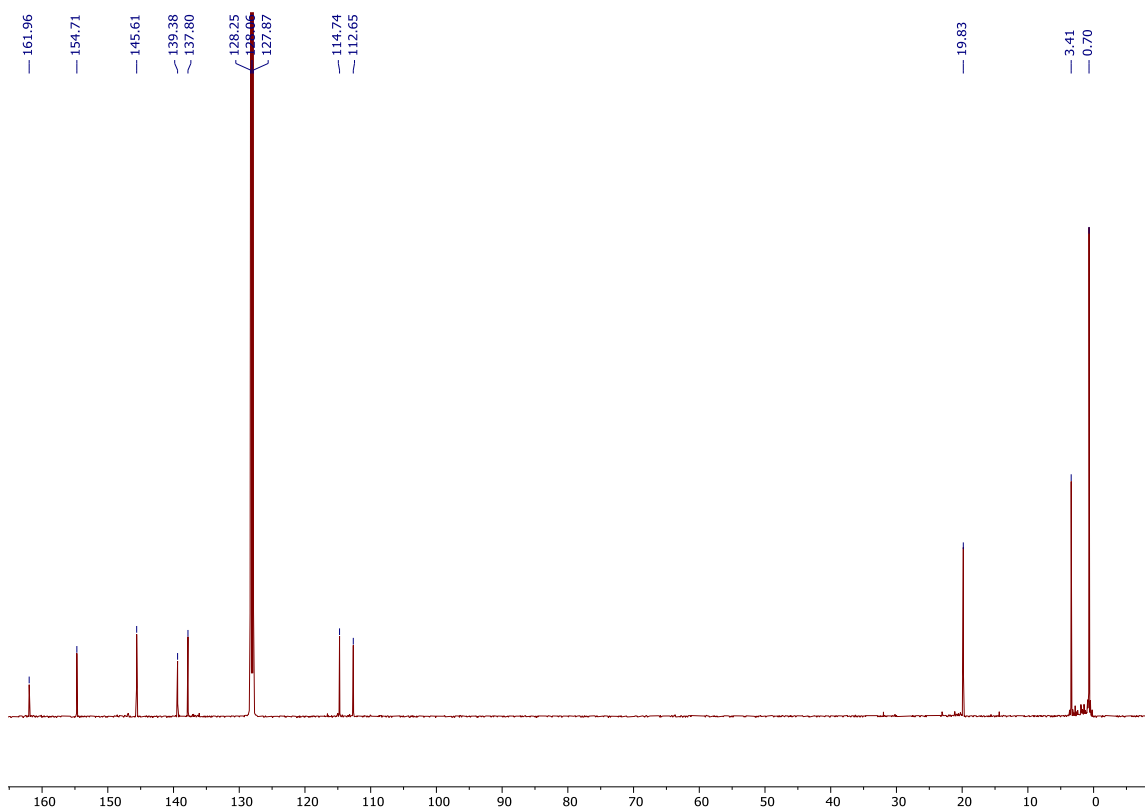

Figure S1b.  $^{13}\text{C}\{^1\text{H}\}$  NMR (125.8 MHz, 305.0 K,  $\text{C}_6\text{D}_6$ ) spectrum of **7**.

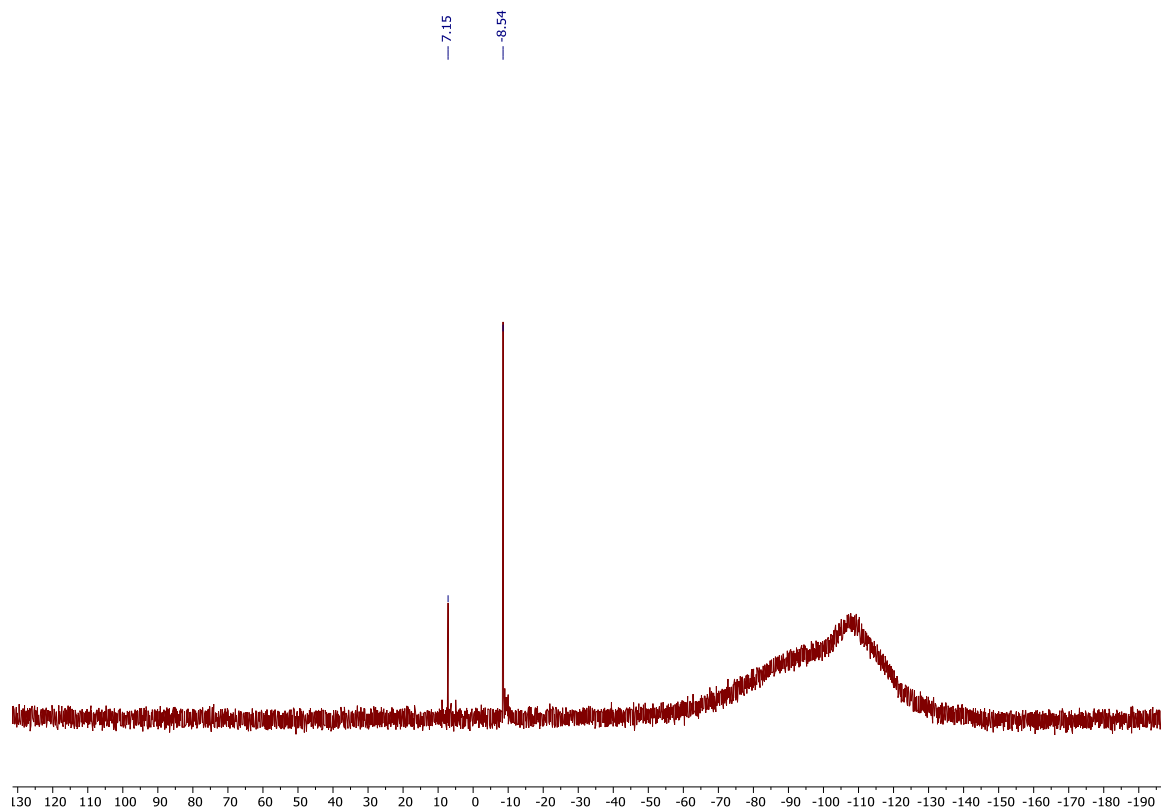

Figure S1c.  $^{29}\text{Si}\{^1\text{H}\}$  NMR (99.4 MHz, 305.0 K,  $\text{C}_6\text{D}_6$ ) spectrum of **7**.

## Synthesis of [K(18-c-6)][6]:

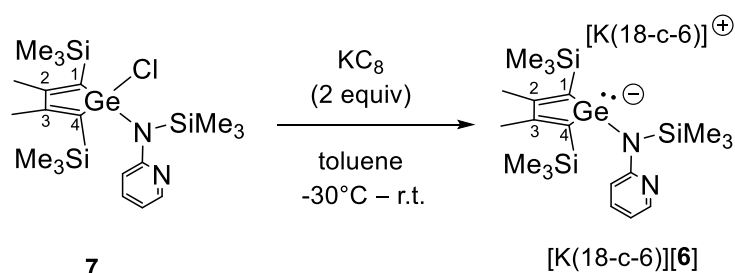

Scheme S2

[K(18-c-6)][6].  $\text{KC}_8$  (81 mg, 0.6 mmol) was added to a toluene solution of compound **7** (150 mg, 0.30 mmol) and 18-c-6 (79 mg, 0.30 mmol) at  $-30^\circ\text{C}$ . The reaction was kept stirring for overnight at room temperature. After that, the precipitate was removed through PTFE filter. The filtrate was concentrated to about 2 mL at  $+5^\circ\text{C}$  to get reddish crystals of [K(18-c-6)][6] after three days. Yield: 117 mg (0.15 mmol, 50 %)

NMR spectra recorded in  $\text{C}_6\text{D}_6$  at 305 K.

$^1\text{H}$  NMR (499.9 MHz, 305.0 K,  $\text{C}_6\text{D}_6$ ):  $\delta$  = 0.46 (s, 18H, C-SiMe<sub>3</sub>), 0.89 (s, 9H, N-SiMe<sub>3</sub>), 2.46 (s, 6H, CH<sub>3</sub>), 3.10 (s, 24H, 18-C-6), 6.29 (m, 1H, Py), 6.42 (m, 1H, Py), 7.12 (m, 1H, Py), 8.20 (m, 1H, Py),

$^{13}\text{C}\{^1\text{H}\}$  NMR (125.8 MHz, 305.0 K,  $\text{C}_6\text{D}_6$ ):  $\delta$  = 2.73 (C-SiMe<sub>3</sub>), 5.84 (N-SiMe<sub>3</sub>), 22.42 (CH<sub>3</sub>), 69.96 (18-c-6), 110.24, 116.33, 135.35 (Py), 145.21 (C<sup>2/3</sup>), 147.58 (Py), 168.97 (C<sup>1/4</sup>), 171.23 (Py).

$^{29}\text{Si}\{^1\text{H}\}$  NMR (99.4 MHz, 305.0 K,  $\text{C}_6\text{D}_6$ ):  $\delta$  = -12.87 (C-SiMe<sub>3</sub>), -3.10 (N-SiMe<sub>3</sub>).

EA: C/H/N [%] calculated for  $\text{C}_{32}\text{H}_{61}\text{GeKN}_2\text{O}_6\text{Si}_3$ : 50.19/8.03/3.66; found: 50.46/8.44/3.87.

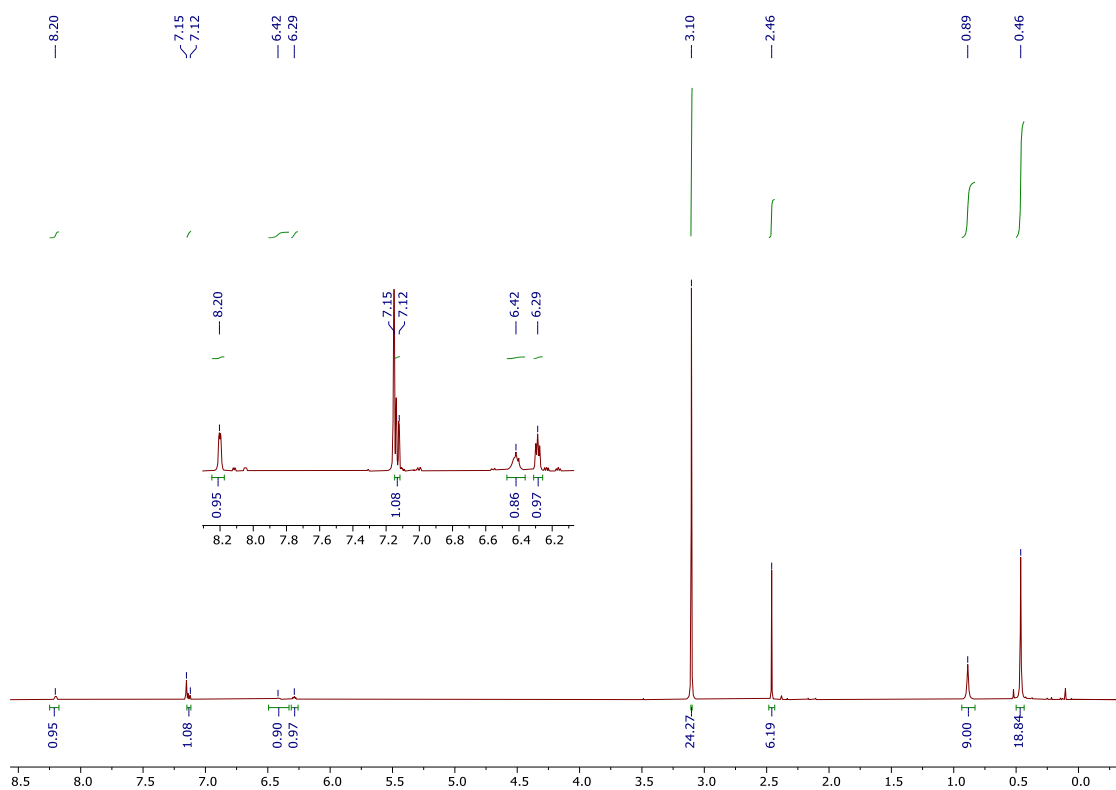

Figure S2a.  $^1\text{H}$  NMR (499.0 MHz, 305.0 K,  $\text{C}_6\text{D}_6$ ) spectrum of  $[\text{K}(18\text{-c-6})][\mathbf{6}]$ .

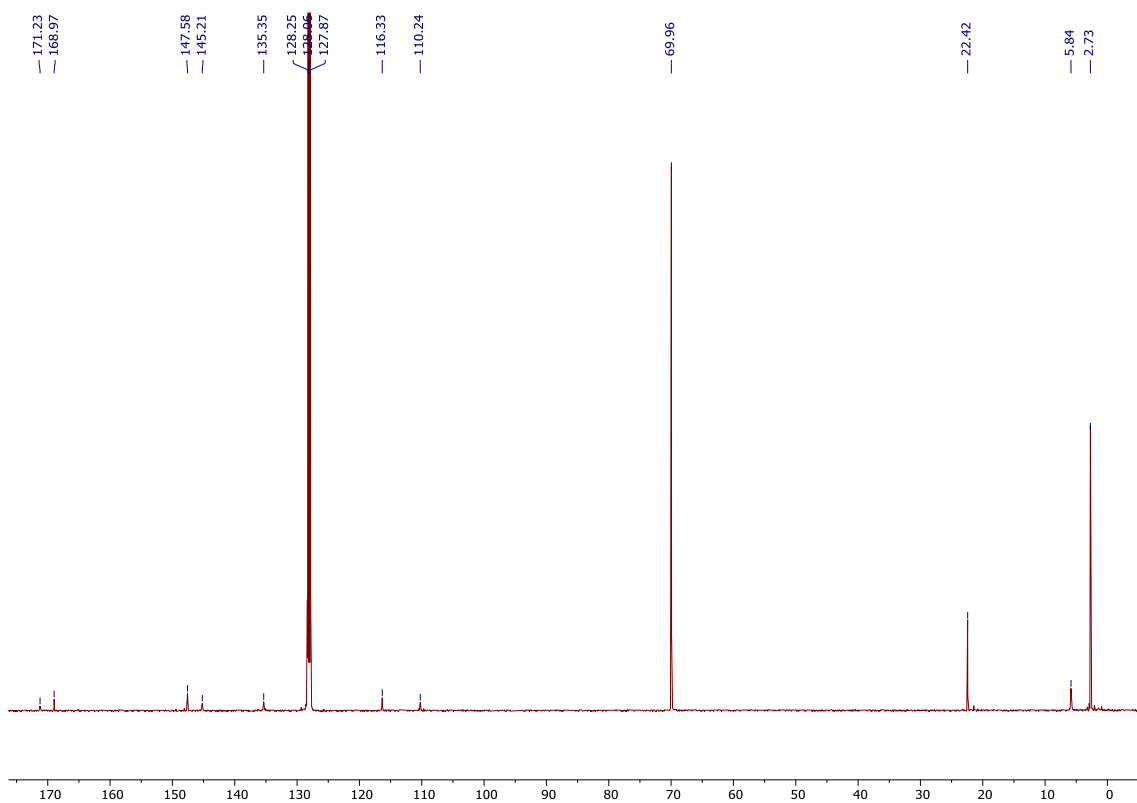

Figure S2b.  $^{13}\text{C}\{^1\text{H}\}$  NMR (125.8 MHz, 305.0 K,  $\text{C}_6\text{D}_6$ ) spectrum of  $[\text{K}(18\text{-c-6})][\mathbf{6}]$ .

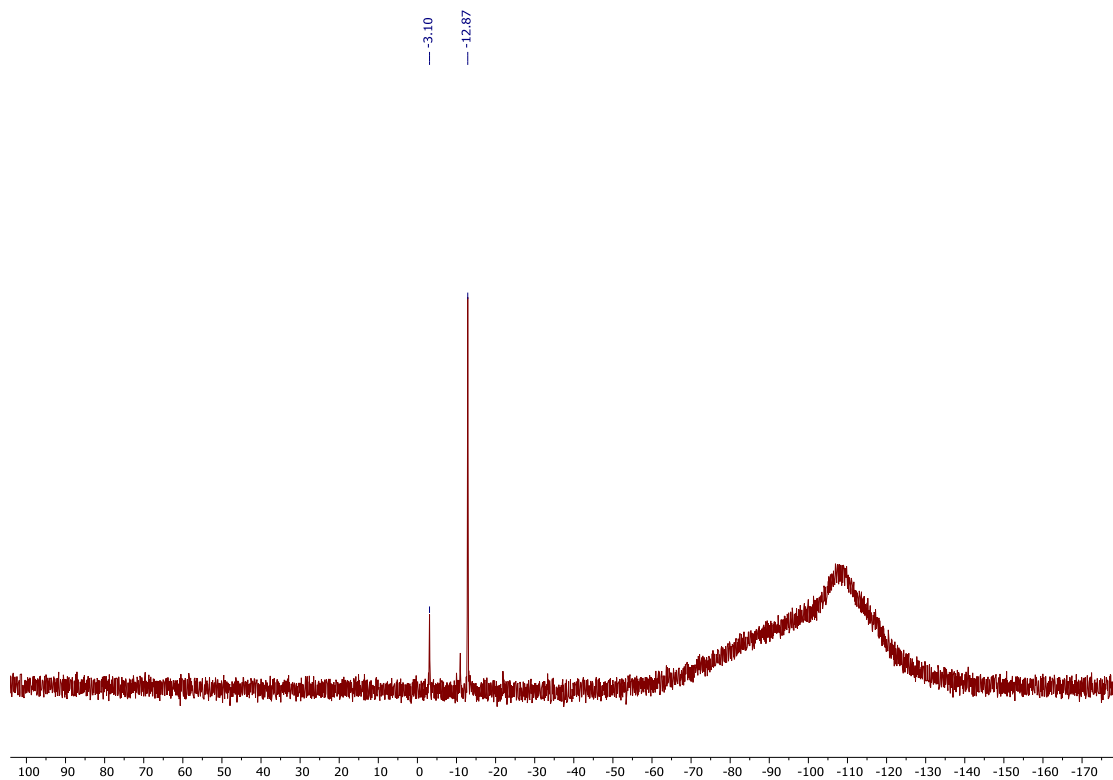

Figure S2c.  $^{29}\text{Si}\{^1\text{H}\}$  NMR (99.4 MHz, 305.0 K,  $\text{C}_6\text{D}_6$ ) spectrum of  $[\text{K}(18\text{-c-}6)][\mathbf{6}]$ .



## Synthesis of 10:

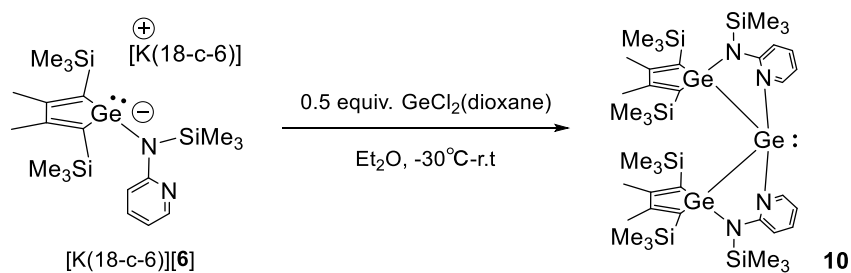

**10.**  $\text{GeCl}_2(\text{dioxane})$  (46 mg, 0.20 mmol) was added to an  $\text{Et}_2\text{O}$  solution of compound  $[\text{K}(18\text{-c-}6)][\mathbf{6}]$  (307 mg, 0.40 mmol) at  $-30\text{ }^\circ\text{C}$ . The reaction was kept stirring for overnight at room temperature. The solvent was removed under vacuum. The residue was re-dissolved in n-hexane (15 mL) and the filtrate was removed solvent to get yellow solid **10**. Yield: 149 mg raw product contaminated with residual crown ether. From the  $^1\text{H}$  NMR (Figure S3a) a yield of 63 mg of **10** is calculated (0.06 mmol) (31%). A small crop of crystal for sc-XRD were collected from diethyl ether.

NMR spectra recorded in  $\text{C}_6\text{D}_6$  at 305 K.

$^1\text{H}$  NMR (499.9 MHz, 305.0 K,  $\text{C}_6\text{D}_6$ ):  $\delta$  = 0.15 (s, 18H, C-SiMe<sub>3</sub>), 0.34 (s, 18H, N-SiMe<sub>3</sub>), 0.40 (s, 18H, C-SiMe<sub>3</sub>), 1.95 (s, 6H, CH<sub>3</sub>), 2.17 (s, 6H, CH<sub>3</sub>), 5.99-6.02 (m, 2H, Py), 6.31-6.33 (m, 1H, Py), 6.75 (d, 1H, Py), 6.85-6.88 (m, 1H, Py), 6.93-7.05 (m, 1H, Py), 7.88-7.90 (m, 1H, Py), 8.08-8.13 (m, 1H, Py).

$^{13}\text{C}\{^1\text{H}\}$  NMR (125.8 MHz, 305.0 K,  $\text{C}_6\text{D}_6$ ):  $\delta$  = 1.10 (C-SiMe<sub>3</sub>), 1.40 (N-SiMe<sub>3</sub>), 2.34 (C-SiMe<sub>3</sub>), 21.08, 21.14 (CH<sub>3</sub>), 110.15, 110.93, 113.18, 115.28, 136.61, 137.10, 146.90 (Py), 148.53, 148.64 ( $\text{C}^{1/4}$ ), 155.43 (Py), 156.82, 157.17 ( $\text{C}^{2/3}$ ), 160.50, 162.19 (Py).

$^{29}\text{Si}\{^1\text{H}\}$  NMR (99.4 MHz, 305.0 K,  $\text{C}_6\text{D}_6$ ):  $\delta$  = -10.02, 9.93 (C-SiMe<sub>3</sub>), 8.24 (N-SiMe<sub>3</sub>).

HR-MS (ESI):  $m/z$  calculated for  $\text{C}_{40}\text{H}_{74}\text{Ge}_3\text{N}_4\text{Si}_6 + \text{H}$ : 1001.2237; found: 1001.2239.

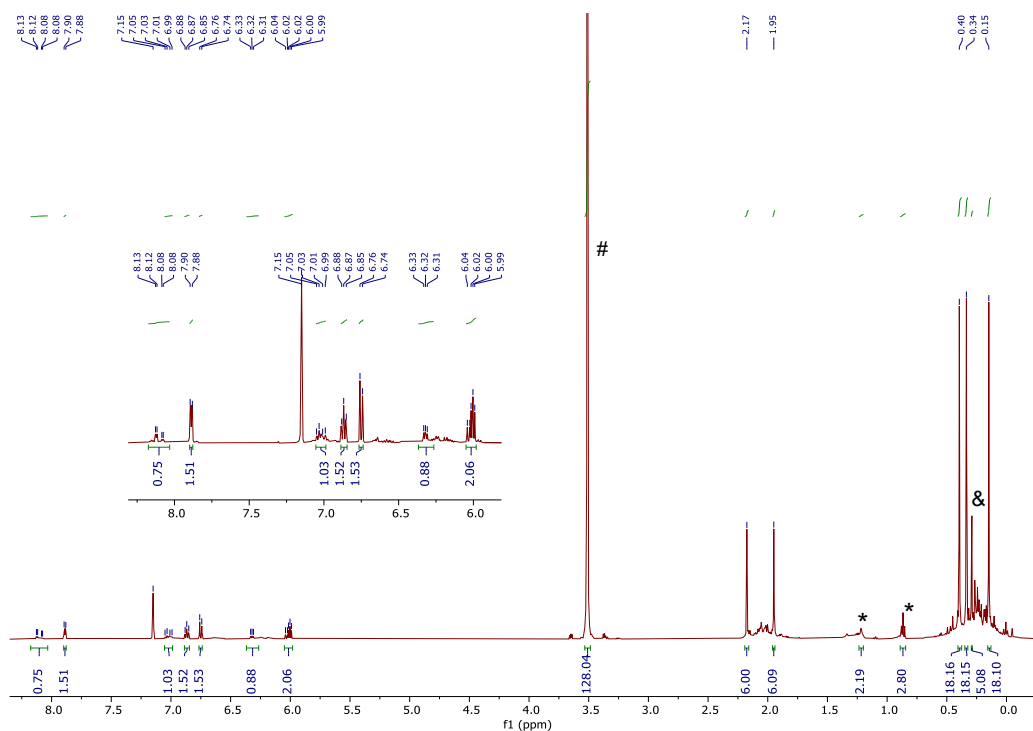

Figure S3a.  $^1\text{H}$  NMR (499.0 MHz, 305.0 K,  $\text{C}_6\text{D}_6$ ) spectrum of **10** (\*n-hexane, #free 18-c-6, &unknown impurities).

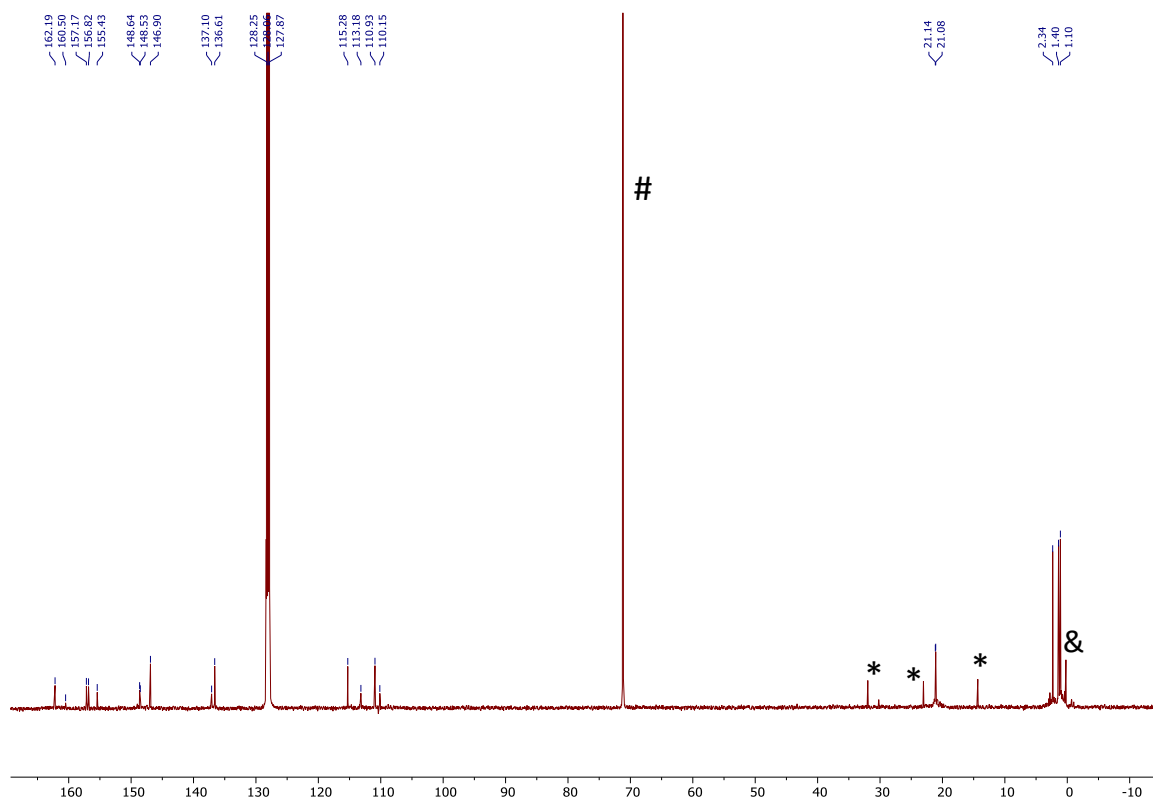

Figure S3b.  $^{13}\text{C}\{^1\text{H}\}$  NMR (125.8 MHz, 305.0 K,  $\text{C}_6\text{D}_6$ ) spectrum of **10** (\*n-hexane, #free 18-c-6, &unknown impurities).

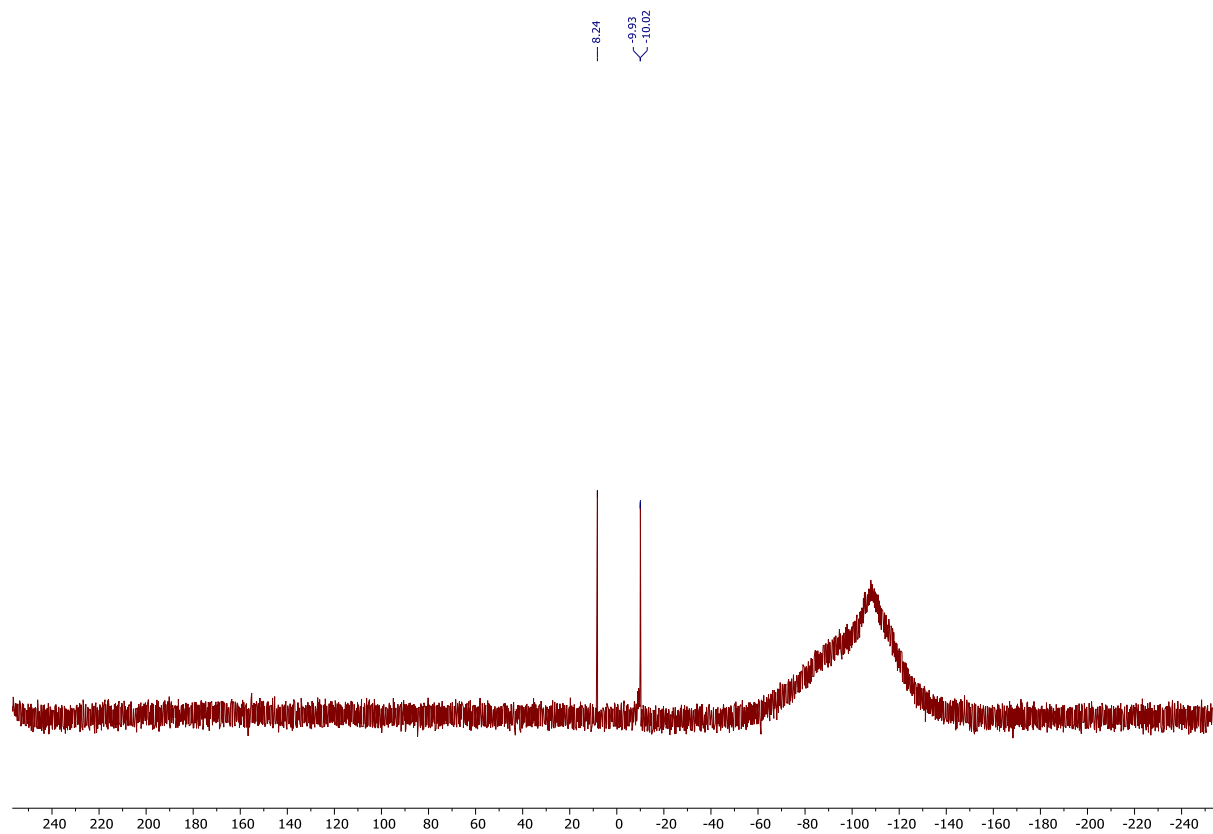

Figure S3c.  $^{29}\text{Si}\{^1\text{H}\}$  NMR (99.4 MHz, 305.0 K,  $\text{C}_6\text{D}_6$ ) spectrum of **10**.

## Synthesis of 11:

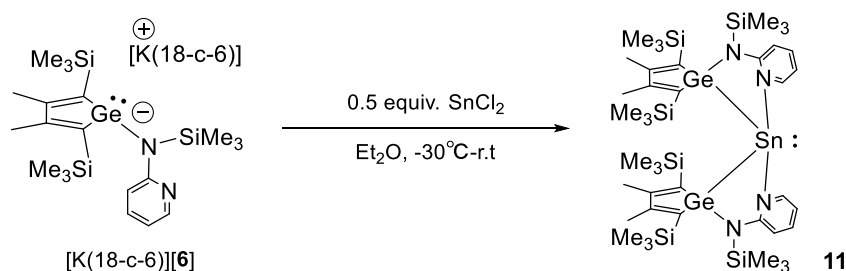

**11.** SnCl<sub>2</sub> (27 mg, 0.15 mmol) was added to an Et<sub>2</sub>O solution of compound [K(18-c-6)][**6**] (223 mg, 0.29 mmol) at -30 °C. The reaction was kept stirring for overnight at room temperature. The solvent was removed under vacuum. The residue was re-dissolved in n-hexane (15 mL) and the filtrate was removed solvent to get yellow solid **11**. Yield: 117 mg raw product contaminated with residual crown ether. From the <sup>1</sup>H NMR (Figure S4a) a yield of 93 mg of **11** is calculated (0.09 mmol) (60%). A small crop of crystal for sc-XRD were collected from diethyl ether.

NMR spectra recorded in C<sub>6</sub>D<sub>6</sub> at 305 K.

<sup>1</sup>H NMR (499.9 MHz, 305.0 K, C<sub>6</sub>D<sub>6</sub>): δ = 0.16 (s, 18H, C-SiMe<sub>3</sub>), 0.34 (s, 18H, N-SiMe<sub>3</sub>), 0.49 (s, 18H, C-SiMe<sub>3</sub>), 2.05 (s, 6H, CH<sub>3</sub>), 2.21 (s, 6H, CH<sub>3</sub>), 5.94-5.97(m, 2H, Py), 6.79-6.86 (m, 4H, Py), 7.67-7.68 (m, 2H, Py).

<sup>13</sup>C{<sup>1</sup>H} NMR (125.8 MHz, 305.0 K, C<sub>6</sub>D<sub>6</sub>): δ = 1.41 (C-SiMe<sub>3</sub>), 1.55 (N-SiMe<sub>3</sub>), 2.06 (C-SiMe<sub>3</sub>), 21.15 (CH<sub>3</sub>), 110.07, 111.50, 113.19, 115.87, 137.11, 147.65, 148.57, 151.05 (Py), 155.55 (C<sup>1/4</sup>), 156.60 (Py), 157.54 (C<sup>2/3</sup>), 163.42 (Py).

<sup>29</sup>Si{<sup>1</sup>H} NMR (99.4 MHz, 305.0 K, C<sub>6</sub>D<sub>6</sub>): δ = -10.31 (C-SiMe<sub>3</sub>), 9.10 (N-SiMe<sub>3</sub>).

<sup>119</sup>Sn{<sup>1</sup>H} NMR (186.4 MHz, 305.0 K, C<sub>6</sub>D<sub>6</sub>): δ = -263.3.

HR-MS (ESI): m/z calculated for C<sub>40</sub>H<sub>74</sub>Ge<sub>2</sub>N<sub>4</sub>Si<sub>6</sub>Sn+H: 1047.2047; found: 1047.2053.

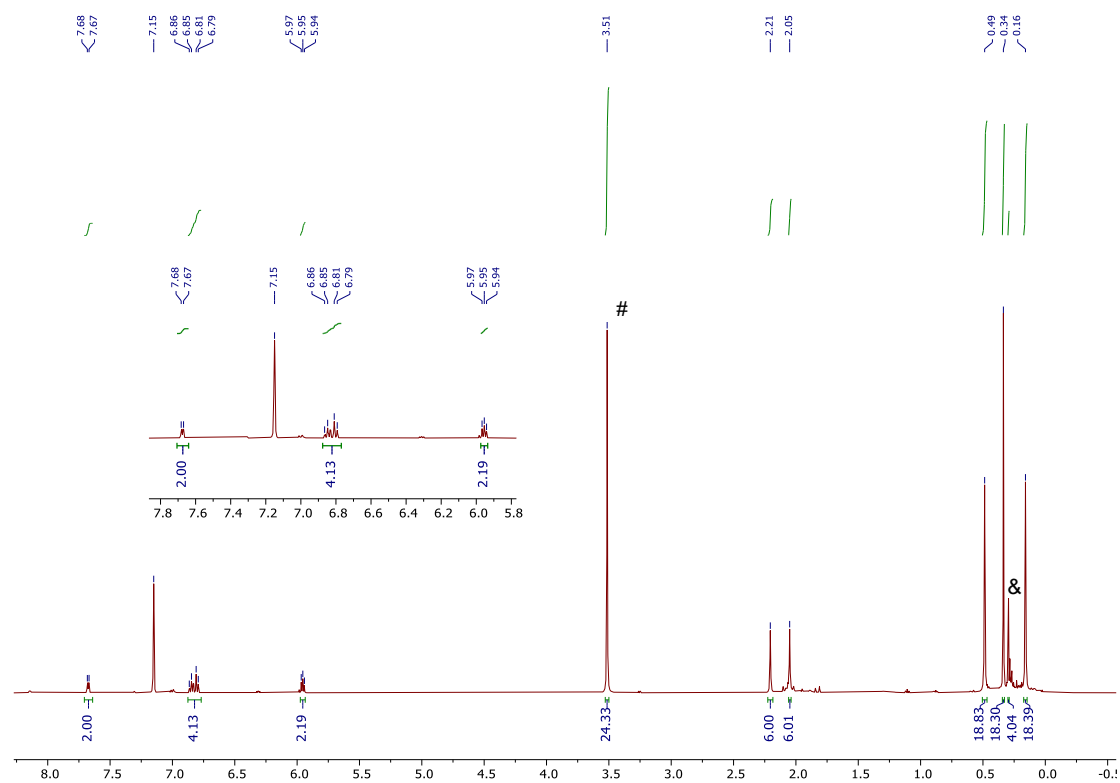

Figure S4a.  $^1\text{H}$  NMR (499.0 MHz, 305.0 K,  $\text{C}_6\text{D}_6$ ) spectrum of **11** (#free 18-c-6, &unknown impurities).

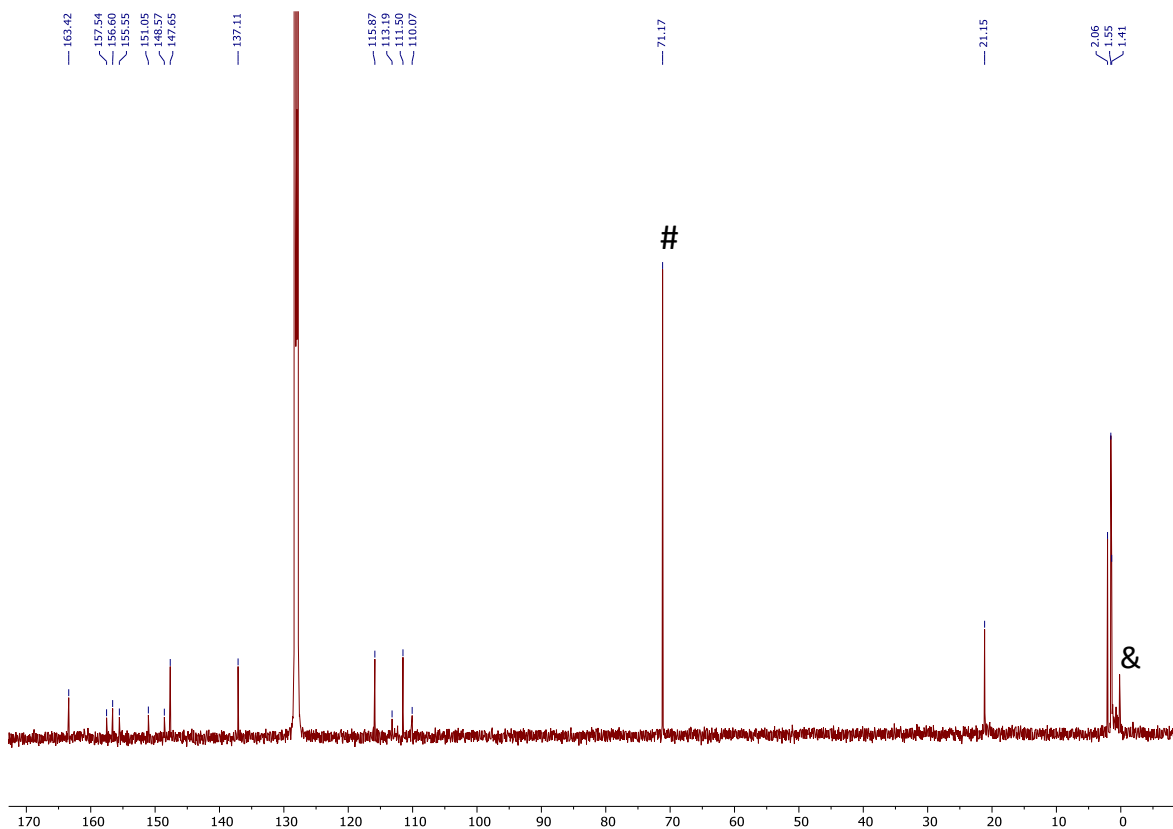

Figure S4b.  $^{13}\text{C}\{^1\text{H}\}$  NMR (125.8 MHz, 305.0 K,  $\text{C}_6\text{D}_6$ ) spectrum of **11** (#free 18-c-6, &unknown impurities).

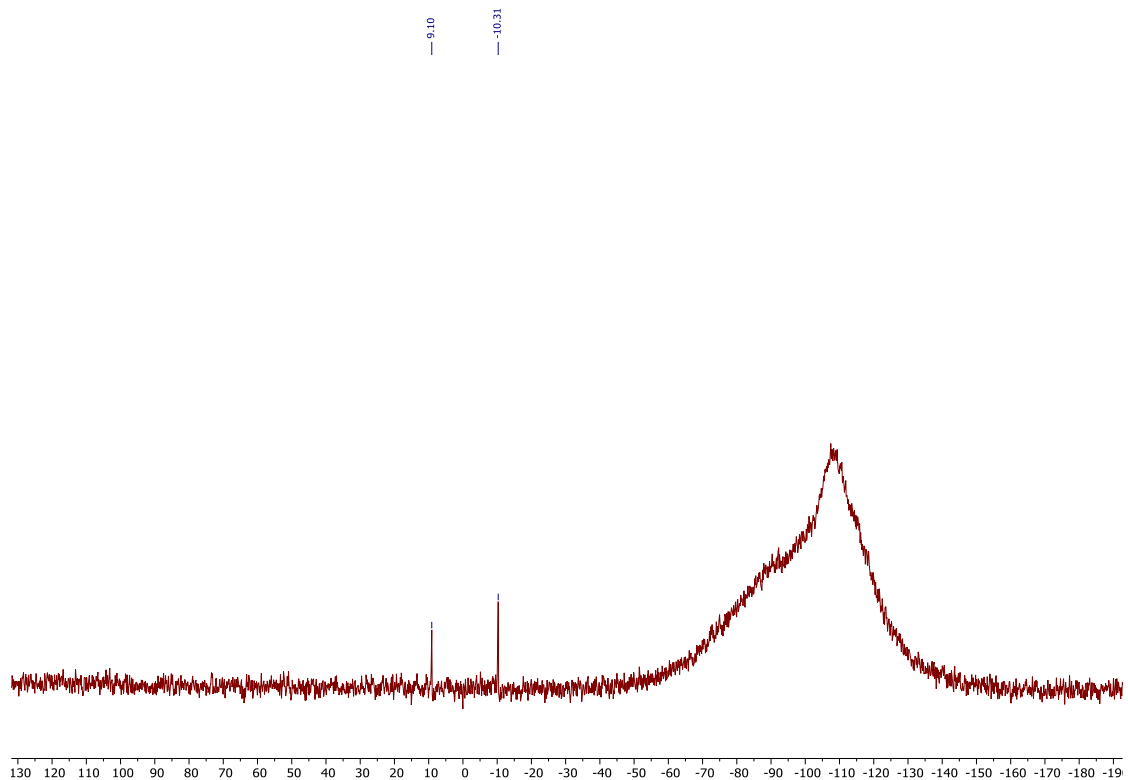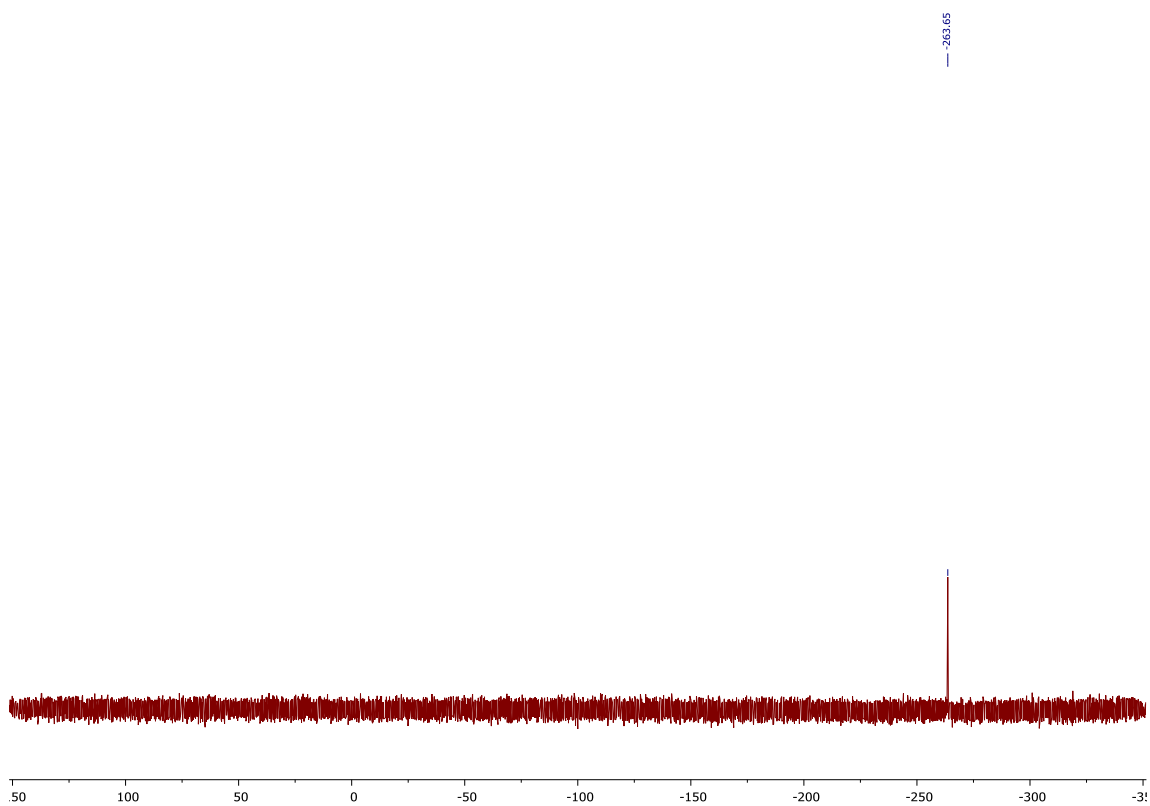

## Details of X-ray Analysis

Single crystal X-ray data were measured on a Bruker AXS Apex II diffractometer (Mo-K $\alpha$  radiation,  $\lambda = 0.71073\text{\AA}$ , Kappa 4 circle goniometer, Bruker Apex II detector). The crystal was kept at 100.0 K during data collection. Absorption corrections based on symmetry-related measurements (multi-scan) were performed with the program SADABS.<sup>[S3]</sup> The structures were solved with the program SHELXS and refined with SHELXL.<sup>[S4]</sup> Pertinent data are summarized in Table S1-S5. CCDC-2392569 (**7**), CCDC-2392567 ([K(18-c-6)]**[6]**), CCDC-2392568 (**10**), CCDC-2392570 (**11**) contain the supplementary crystallographic data for this paper. These data can be obtained free of charge from The Cambridge Crystallographic Data Centre. The Director, CCDC, 12 Union Road, Cambridge CB2 1EZ, UK [Fax: (internat.) +44-1223/336-033; E-mail: [deposit@ccdc.cam.ac.uk](mailto:deposit@ccdc.cam.ac.uk)].

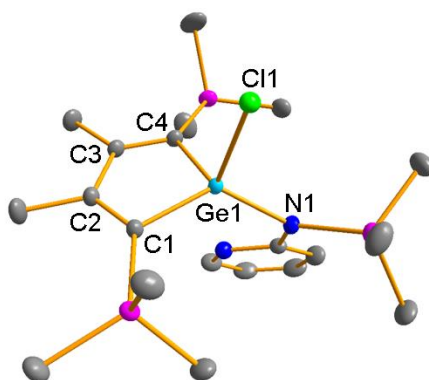

Figure S6. Molecular structure of **7** in the crystal. (Hydrogen atoms are omitted for clarity. Thermal ellipsoids are shown at the 50 % probability level.) Selected bond lengths [pm] and angles [°]: Ge1–Cl1 223.6(4), Ge1–C1 194.0(6), Ge1–C4 193.0(8), Ge1–N1 187.1(6), C1–C2 135.8(8), C2–C3 152.0(9), C3–C4 135.6(9).

**Table S1.**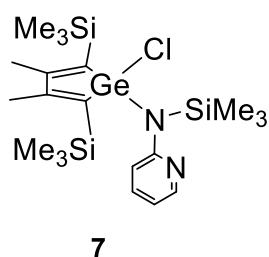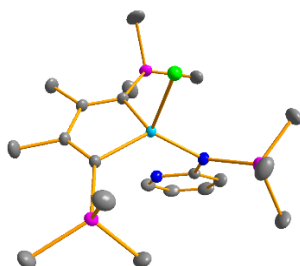

|                                   |                                                                      |                   |
|-----------------------------------|----------------------------------------------------------------------|-------------------|
| Name                              | <b>7</b>                                                             |                   |
| CCDC                              | 2392569                                                              |                   |
| Empirical formula                 | C <sub>20</sub> H <sub>37</sub> Cl Ge N <sub>2</sub> Si <sub>3</sub> |                   |
| Formula weight                    | 497.82                                                               |                   |
| Temperature                       | 100(2) K                                                             |                   |
| Wavelength                        | 0.71073 Å                                                            |                   |
| Crystal system                    | Monoclinic                                                           |                   |
| Space group                       | P2 <sub>1</sub> /c                                                   |                   |
| Unit cell dimensions              | a = 10.2981(5) Å                                                     | a = 90°.          |
|                                   | b = 15.1609(7) Å                                                     | b = 99.0183(19)°. |
|                                   | c = 17.3330(8) Å                                                     | g = 90°.          |
| Volume                            | 2672.7(2) Å <sup>3</sup>                                             |                   |
| Z                                 | 4                                                                    |                   |
| Density (calculated)              | 1.237 Mg/m <sup>3</sup>                                              |                   |
| Absorption coefficient            | 1.389 mm <sup>-1</sup>                                               |                   |
| F(000)                            | 1048                                                                 |                   |
| Crystal size                      | 0.110 x 0.100 x 0.080 mm <sup>3</sup>                                |                   |
| Theta range for data collection   | 1.794 to 40.248°                                                     |                   |
| Index ranges                      | -18 ≤ h ≤ 18, -27 ≤ k ≤ 27, -31 ≤ l ≤ 31                             |                   |
| Reflections collected             | 202917                                                               |                   |
| Independent reflections           | 16828 (R(int) = 0.0394)                                              |                   |
| Observed reflections (I > 2(I))   | 14550                                                                |                   |
| Completeness to theta = 40.248°   | 100.0 %                                                              |                   |
| Absorption correction             | Semi-empirical from equivalents                                      |                   |
| Max. and min. transmission        | 1.0000 and 0.9290                                                    |                   |
| Refinement method                 | Full-matrix least-squares on F <sup>2</sup>                          |                   |
| Data / restraints / parameters    | 16828 / 0 / 255                                                      |                   |
| Goodness-of-fit on F <sup>2</sup> | 1.048                                                                |                   |
| Final R indices (I > 2σ(I))       | R1 = 0.0222, wR2 = 0.0560                                            |                   |
| R indices (all data)              | R1 = 0.0291, wR2 = 0.0586                                            |                   |
| Extinction coefficient            | n/a                                                                  |                   |
| Largest diff. peak and hole       | 0.734 and -0.425 e.Å <sup>-3</sup>                                   |                   |



**Table S2.**

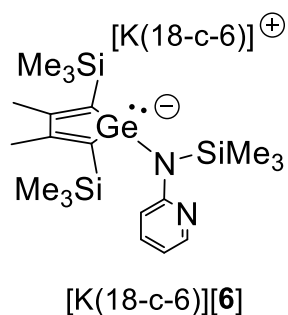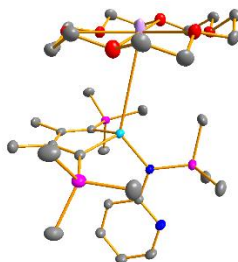

|                                   |                                                                                    |                    |
|-----------------------------------|------------------------------------------------------------------------------------|--------------------|
| Name                              | [K(18-c-6)][6]                                                                     |                    |
| CCDC                              | 2392567                                                                            |                    |
| Empirical formula                 | C <sub>32</sub> H <sub>61</sub> Ge K N <sub>2</sub> O <sub>6</sub> Si <sub>3</sub> |                    |
| Formula weight                    | 765.78                                                                             |                    |
| Temperature                       | 100(2) K                                                                           |                    |
| Wavelength                        | 0.71073 Å                                                                          |                    |
| Crystal system                    | Monoclinic                                                                         |                    |
| Space group                       | P2 <sub>1</sub> /c                                                                 |                    |
| Unit cell dimensions              | a = 19.6032(9) Å                                                                   | a = 90°.           |
|                                   | b = 10.9806(5) Å                                                                   | b = 110.1445(14)°. |
|                                   | c = 20.4878(8) Å                                                                   | g = 90°.           |
| Volume                            | 4140.3(3) Å <sup>3</sup>                                                           |                    |
| Z                                 | 4                                                                                  |                    |
| Density (calculated)              | 1.229 Mg/m <sup>3</sup>                                                            |                    |
| Absorption coefficient            | 0.966 mm <sup>-1</sup>                                                             |                    |
| F(000)                            | 1632                                                                               |                    |
| Crystal size                      | 0.140 x 0.080 x 0.060 mm <sup>3</sup>                                              |                    |
| Theta range for data collection   | 2.024 to 32.031°                                                                   |                    |
| Index ranges                      | ?<=h<=?, ?<=k<=?, ?<=l<=?                                                          |                    |
| Reflections collected             | 14418                                                                              |                    |
| Independent reflections           | 14418 (R(int) = ?)                                                                 |                    |
| Observed reflections (I > 2(I))   | 12216                                                                              |                    |
| Completeness to theta = 32.031°   | 100.0 %                                                                            |                    |
| Absorption correction             | Semi-empirical from equivalents                                                    |                    |
| Max. and min. transmission        | 1.000000 and 0.844277                                                              |                    |
| Refinement method                 | Full-matrix least-squares on F <sup>2</sup>                                        |                    |
| Data / restraints / parameters    | 14418 / 0 / 420                                                                    |                    |
| Goodness-of-fit on F <sup>2</sup> | 1.033                                                                              |                    |
| Final R indices (I>2sigma(I))     | R1 = 0.0410, wR2 = 0.0817                                                          |                    |
| R indices (all data)              | R1 = 0.0546, wR2 = 0.0867                                                          |                    |
| Extinction coefficient            | n/a                                                                                |                    |
| Largest diff. peak and hole       | 0.638 and -0.623 e.Å <sup>-3</sup>                                                 |                    |

**Table S3.**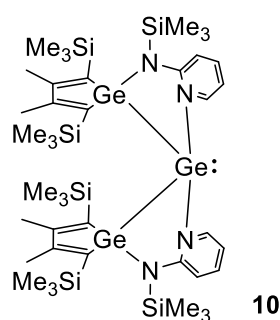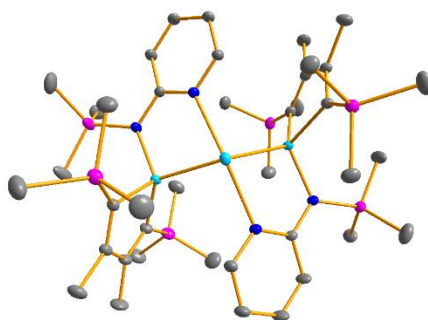

|                                   |                                                                                |                   |
|-----------------------------------|--------------------------------------------------------------------------------|-------------------|
| Name                              | <b>10</b>                                                                      |                   |
| CCDC                              | 2392568                                                                        |                   |
| Empirical formula                 | C <sub>40</sub> H <sub>74</sub> Ge <sub>3</sub> N <sub>4</sub> Si <sub>6</sub> |                   |
| Formula weight                    | 997.34                                                                         |                   |
| Temperature                       | 100(2) K                                                                       |                   |
| Wavelength                        | 0.71073 Å                                                                      |                   |
| Crystal system                    | Triclinic                                                                      |                   |
| Space group                       | P-1                                                                            |                   |
| Unit cell dimensions              | a = 10.8498(5) Å                                                               | a = 76.534(2)°.   |
|                                   | b = 14.8521(7) Å                                                               | b = 82.7769(19)°. |
|                                   | c = 16.7213(8) Å                                                               | g = 88.1701(19)°. |
| Volume                            | 2599.6(2) Å <sup>3</sup>                                                       |                   |
| Z                                 | 2                                                                              |                   |
| Density (calculated)              | 1.274 Mg/m <sup>3</sup>                                                        |                   |
| Absorption coefficient            | 1.891 mm <sup>-1</sup>                                                         |                   |
| F(000)                            | 1044                                                                           |                   |
| Crystal size                      | 0.110 x 0.100 x 0.030 mm <sup>3</sup>                                          |                   |
| Theta range for data collection   | 1.262 to 36.318°                                                               |                   |
| Index ranges                      | -18<=h<=18, -24<=k<=24, -27<=l<=27                                             |                   |
| Reflections collected             | 208606                                                                         |                   |
| Independent reflections           | 25206 (R(int) = 0.0468)                                                        |                   |
| Observed reflections (I > 2(I))   | 21572                                                                          |                   |
| Completeness to theta = 36.318°   | 100.0 %                                                                        |                   |
| Absorption correction             | Semi-empirical from equivalents                                                |                   |
| Max. and min. transmission        | 1.0000 and 0.8787                                                              |                   |
| Refinement method                 | Full-matrix least-squares on F <sup>2</sup>                                    |                   |
| Data / restraints / parameters    | 25206 / 0 / 500                                                                |                   |
| Goodness-of-fit on F <sup>2</sup> | 1.127                                                                          |                   |
| Final R indices (I > 2sigma(I))   | R1 = 0.0300, wR2 = 0.0741                                                      |                   |
| R indices (all data)              | R1 = 0.0390, wR2 = 0.0771                                                      |                   |
| Extinction coefficient            | n/a                                                                            |                   |
| Largest diff. peak and hole       | 0.931 and -0.719 e.Å <sup>-3</sup>                                             |                   |

**Table S4.**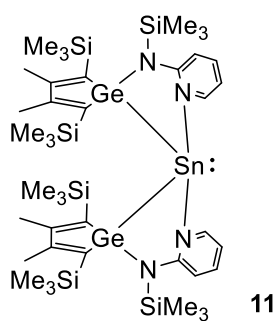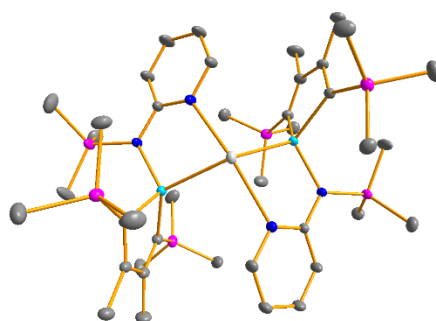

|                                   |                                                                                   |                   |
|-----------------------------------|-----------------------------------------------------------------------------------|-------------------|
| Name                              | <b>11</b>                                                                         |                   |
| CCDC                              | 2392570                                                                           |                   |
| Empirical formula                 | C <sub>40</sub> H <sub>74</sub> Ge <sub>2</sub> N <sub>4</sub> Si <sub>6</sub> Sn |                   |
| Formula weight                    | 1043.44                                                                           |                   |
| Temperature                       | 100(2) K                                                                          |                   |
| Wavelength                        | 0.71073 Å                                                                         |                   |
| Crystal system                    | Triclinic                                                                         |                   |
| Space group                       | P-1                                                                               |                   |
| Unit cell dimensions              | a = 11.9907(7) Å                                                                  | a = 79.3746(19)°. |
|                                   | b = 14.3069(8) Å                                                                  | b = 84.9106(19)°. |
|                                   | c = 15.3368(8) Å                                                                  | g = 89.631(2)°.   |
| Volume                            | 2575.6(2) Å <sup>3</sup>                                                          |                   |
| Z                                 | 2                                                                                 |                   |
| Density (calculated)              | 1.345 Mg/m <sup>3</sup>                                                           |                   |
| Absorption coefficient            | 1.810 mm <sup>-1</sup>                                                            |                   |
| F(000)                            | 1080                                                                              |                   |
| Crystal size                      | 0.140 x 0.120 x 0.100 mm <sup>3</sup>                                             |                   |
| Theta range for data collection   | 1.356 to 40.249°                                                                  |                   |
| Index ranges                      | -21 ≤ h ≤ 21, -26 ≤ k ≤ 26, -27 ≤ l ≤ 27                                          |                   |
| Reflections collected             | 336545                                                                            |                   |
| Independent reflections           | 32397 (R(int) = 0.0347)                                                           |                   |
| Observed reflections (I > 2(I))   | 29390                                                                             |                   |
| Completeness to theta = 40.249°   | 100.0 %                                                                           |                   |
| Absorption correction             | Semi-empirical from equivalents                                                   |                   |
| Max. and min. transmission        | 1.0000 and 0.9181                                                                 |                   |
| Refinement method                 | Full-matrix least-squares on F <sup>2</sup>                                       |                   |
| Data / restraints / parameters    | 32397 / 0 / 500                                                                   |                   |
| Goodness-of-fit on F <sup>2</sup> | 1.057                                                                             |                   |
| Final R indices (I > 2σ(I))       | R1 = 0.0176, wR2 = 0.0452                                                         |                   |
| R indices (all data)              | R1 = 0.0214, wR2 = 0.0466                                                         |                   |
| Extinction coefficient            | n/a                                                                               |                   |
| Largest diff. peak and hole       | 0.990 and -0.781 e.Å <sup>-3</sup>                                                |                   |

## Computational Details

All quantum chemical calculations were carried out using the Gaussian16 package.<sup>[S5]</sup> The natural bond orbital (NBO)<sup>[S6]</sup> analysis was done with the program NBO 7.0.<sup>[S7]</sup> The molecular structure optimization were performed using the M06-2X functional<sup>[S8]</sup> along with the 6-311+G(d,p) basis set. For the element Sn the corresponding pseudo potentials were applied.<sup>[S9]</sup> The AIMALL program was used to perform the QTAIM analysis.<sup>[S10]</sup> For visualization of the natural bond orbitals the program Jmol was used.<sup>[S11]</sup>

For the NBO analysis, the M06-2X functional along with a 6-311+G(d,p) basis set/pseudo potentials was used to generate the density to be analysed. For the QTAIM analysis single point calculations using an all-electron basis set for Sn (def2-mTZVP) and for Ge, Si, N, C, H the 6-311+G(d,p) basis set.<sup>[S12]</sup>

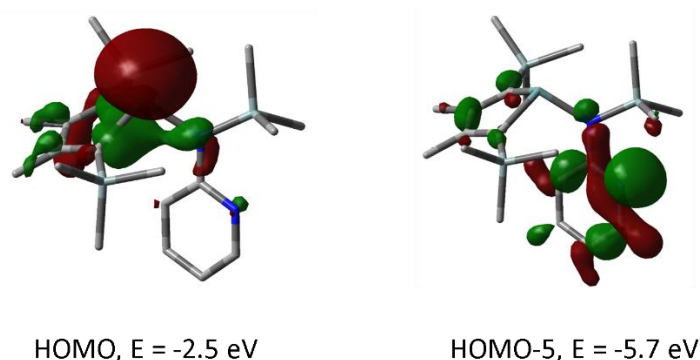

Figure S7. Surface diagrams of selected molecular orbitals of germolide [6] (M06-2X/6-311+G(d,p), isosurface value: 0.04)

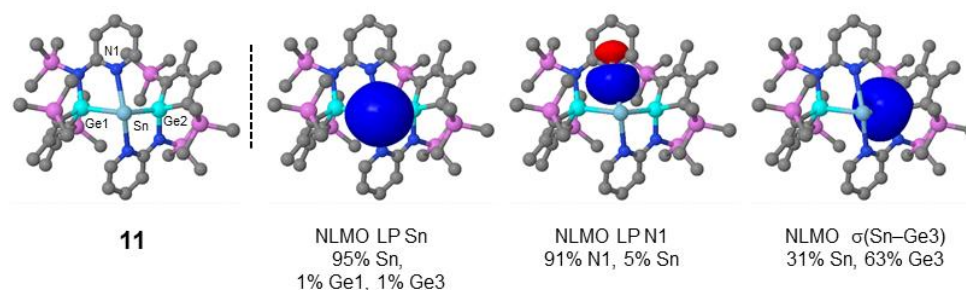

Figure S8. Computed pertinent NLMOs of **11**, showing the interactions between the tin atom Sn1 with the germolyl substituents and the remote pyridine ligand (M06-2X/6-311+G(d,p) (C,H,N,Si,Ge), def2-mTZVP (Sn), isodensity value 0.04 a.u. (Colour code: violet Si, cyan Ge, sky blue Sn, blue N, gray C).

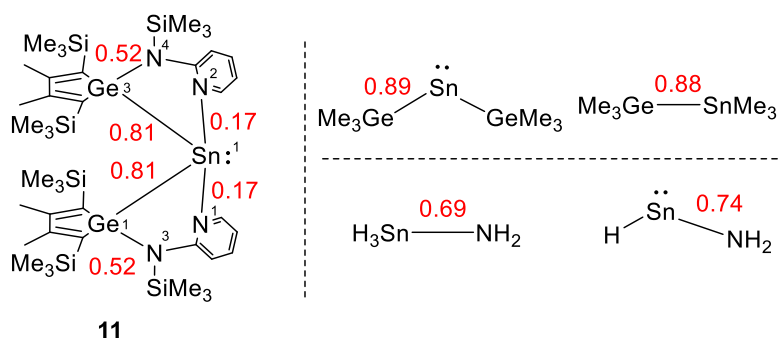

Figure S9. Computed WBIs (red) of *bis*-germylyl stannylene **11**, and related compounds (M06-2X/6-311+G(d,p) (C,H,N,Si,Ge), def2-mTZVP (Sn)).

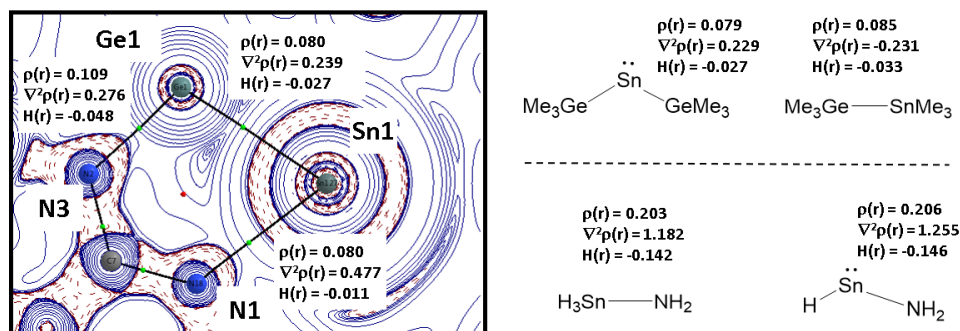

Figure S10. Results of the QTAIM analysis of *bis*-germylyl stannylene **11**, and related compounds. Left side: Part of the molecular graph of stannylene **11** projected on a contour plot of the Laplacian of the electron density in the Ge1Sn1N1 plane. (Green spheres: bond critical points (bcp), red sphere: ring critical point (rcp), electron density at the bcp,  $\rho(r)$ , in  $\text{e}(\text{bohr})^{-3}$ ; Laplacian at the bcp,  $\nabla^2\rho(r)$ , in  $\text{e}(\text{bohr})^{-5}$ ; total energy density at the bcp,  $H(r)$ , in a.u.(bohr) $^{-3}$ , calculations at M06-2X/6-311+G(d,p) (C,H,N,Si,Ge), def2-mTZVP (Sn)).

Table S5. Selected NBO parameters of **10** and **11** (M062X/6-311+G(d,p) (C, H, N, Si, Ge,) def2-mTZVP (Sn)).

| 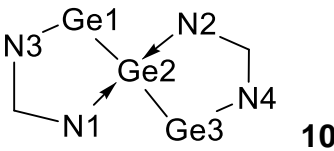 |      |        |  |      |        |
|-----------------------------------------------------------------------------------|------|--------|------------------------------------------------------------------------------------|------|--------|
|                                                                                   | WBI  | Charge |                                                                                    | WBI  | Charge |
| Ge1                                                                               |      | 1.42   | Ge1                                                                                |      | 1.26   |
| Ge2                                                                               |      | 0.19   | Sn1                                                                                |      | 0.57   |
| Ge3                                                                               |      | 1.42   | Ge2                                                                                |      | 1.26   |
| N1                                                                                |      | -0.59  | N1                                                                                 |      | -0.61  |
| N2                                                                                |      | -0.60  | N2                                                                                 |      | -0.61  |
| N3-Ge1                                                                            | 0.51 |        | N3-Ge1                                                                             | 0.52 |        |
| N1-Ge2                                                                            | 0.21 |        | N1-Sn1                                                                             | 0.17 |        |
| Ge1-Ge2                                                                           | 0.92 |        | Ge1-Sn1                                                                            | 0.81 |        |
| N4-Ge3                                                                            | 0.51 |        | N4-Ge2                                                                             | 0.52 |        |
| N2-Ge2                                                                            | 0.23 |        | N2-Sn1                                                                             | 0.17 |        |
| Ge2-Ge3                                                                           | 0.92 |        | Sn1-Ge2                                                                            | 0.81 |        |

Table S6. Selected QTAIM parameters of **10** and **11** (M062X/6-311+G(d,p) (C, H, N, Si, Ge,) def2-mTZVP (Sn)).

|         | <b>10</b>                                       |                                                         |            |                                            |                                                 |                                                         |                                     |
|---------|-------------------------------------------------|---------------------------------------------------------|------------|--------------------------------------------|-------------------------------------------------|---------------------------------------------------------|-------------------------------------|
|         | $\rho(r\text{BCP})$<br>[e(bohr) <sup>-3</sup> ] | $\nabla^2\rho(r\text{BCP})$<br>[e(bohr) <sup>-5</sup> ] | $\epsilon$ | H(rBCP)<br>[a.u.<br>(bohr) <sup>-3</sup> ] | $\rho(r\text{RCP})$<br>[e(bohr) <sup>-3</sup> ] | $\nabla^2\rho(r\text{RCP})$<br>[e(bohr) <sup>-5</sup> ] | H(rRCP)<br>[e(bohr) <sup>-3</sup> ] |
| Ge1-Ge2 | 0.076                                           | -0.046                                                  | 0.178      | -0.030                                     |                                                 |                                                         |                                     |
| N1-Ge2  | 0.043                                           | 0.109                                                   | 0.048      | -0.001                                     |                                                 |                                                         |                                     |
| N3-Ge1  | 0.112                                           | 0.278                                                   | 0.047      | -0.050                                     |                                                 |                                                         |                                     |
| CN2Ge2  |                                                 |                                                         |            |                                            | 0.019                                           | 0.079                                                   | 0.002                               |
|         | <b>11</b>                                       |                                                         |            |                                            |                                                 |                                                         |                                     |
| Ge1-Sn1 | 0.080                                           | 0.239                                                   | 0.066      | -0.027                                     |                                                 |                                                         |                                     |
| N1-Sn1  | 0.080                                           | 0.477                                                   | 0.033      | -0.011                                     |                                                 |                                                         |                                     |
| N3-Ge1  | 0.109                                           | 0.276                                                   | 0.023      | -0.048                                     |                                                 |                                                         |                                     |
| CN2GeSn |                                                 |                                                         |            |                                            | 0.021                                           | 0.086                                                   | 0.001                               |

BCP bond critical point; RCP ring critical point;  $\rho(r\text{BCP})$  electron density at BCP;  $\nabla^2\rho(r\text{BCP})$ : Laplacian at BCP;  $\epsilon$  ellipticity; H(rBCP): total energy density at BCP;  $\rho(r\text{RCP})$  electron density at RCP;  $\nabla^2\rho(r\text{RCP})$ : Laplacian at RCP; H(rRCP): total energy density at BCP.

## References

- [S1]. Z. Dong, C. R. W. Reinhold, M. Schmidtman, T. Müller, *Organometallics.*, **2018**, 37, 4736–4743.
- [S2]. L. Du, H. Wang, Y. Ding, *Polyhedron.*, **2017**, 134, 282-286.
- [S3]. G. M. Sheldrick, SADABS V2014/4, *University of Göttingen, Germany*, **2014**.
- [S4]. G. Sheldrick, *Acta Crystallogr. Sect. C*, **2015**, 71, 3–8.
- [S5]. M. J. Frisch, G. W. Trucks, H. B. Schlegel, G. E. Scuseria, M. A. Robb, J. R. Cheeseman, G. Scalmani, V. Barone, G. A. Petersson, H. Nakatsuji, X. Li, M. Caricato, A. V. Marenich, J. Bloino, B. G. Janesko, R. Gomperts, B. Mennucci, H. P. Hratchian, J. V. Ortiz, A. F. Izmaylov, J. L. Sonnenberg, D. Williams-Young, F. Ding, F. Lipparini, F. Egidi, J. Goings, B. Peng, A. Petrone, T. Henderson, D. Ranasinghe, V. G. Zakrzewski, J. Gao, N. Rega, G. Zheng, W. Liang, M. Hada, M. Ehara, K. Toyota, R. Fukuda, J. Hasegawa, M. Ishida, T. Nakajima, Y. Honda, O. Kitao, H. Nakai, T. Vreven, K. Throssell, J. A. Montgomery, Jr., J. E. Peralta, F. Ogliaro, M. J. Bearpark, J. J. Heyd, E. N. Brothers, K. N. Kudin, V. N. Staroverov, T. A. Keith, R. Kobayashi, J. Normand, K. Raghavachari, A. P. Rendell, J. C. Burant, S. S. Iyengar, J. Tomasi, M. Cossi, J. M. Millam, M. Klene, C. Adamo, R. Cammi, J. W. Ochterski, R. L. Martin, K. Morokuma, O. Farkas, J. B. Foresman and D. J. Fox, *Gaussian, Inc., Wallingford CT*, **2016**.
- [S6]. A. E. Reed, L. A. Curtiss, F. Weinhold, *Chem. Rev.*, **1988**, 88, 899-926.
- [S7]. E. D. Glendening, J. K. Badenhoop, A. E. Reed, J. E. Carpenter, J. A. Bohmann, C. M. Morales, P. Karafiloglu, C. R. Landis, F. Weinhold, Theoretical Chemistry Institute, University of Wisconsin, Madison, **2018**.
- [S8]. Y. Zhao, N. E. Schultz and D. G. Truhlar, *J. Chem. Theory Comput.*, **2006**, 2, 364–382.
- [S9]. (a) R. Krishnan, J. S. Binkley, R. Seeger, J.A. Pople, *J. Chem. Phys.* 1980, 72, 650; (b) A. D. McLean, G. S. Chandler, *J. Chem. Phys.* 1980, 72, 5639 (c) L. A. Curtiss, M. P. McGrath, J-P. Blandeau, N. E. Davis, R. C. Binning, Jr. L. Radom, *J. Chem. Phys.* 1995, 103, 6104 (d) F. Weigend, R. Ahlrichs, *Phys. Chem. Chem. Phys.*, **2005**, 3297
- [S10]. R. F. W. Bader, *Atoms in Molecule: A Quantum Theory*, Clarendon Press, Oxford, U.K., **1990**.

- [S11]. Jmol, an open-source Java viewer for chemical structures in 3D.  
<http://www.jmol.org>.
- [S12]. JG. Brandenburg, C. Bannwarth, A. Hansen, S. Grimme. *J Chem Phys.*,  
**2018**, 148, 064104.
